# Supplementary material
Source: PubMed Central journal article supplement (PMC8477244)
Supplement: bmjgh-2020-003451supp001.pdf [file bmjgh-2020-003451supp001.pdf]

## Predictors of disease severity in children presenting from the community with febrile illnesses: a systematic review of prognostic studies

### Authors and affiliations

Arjun Chandna MD\*,<sup>1,2</sup> Rainer Tan MD\*,<sup>3,4,5</sup> Michael J Carter PhD,<sup>6</sup> Prof Ann Van den Bruel PhD,<sup>7</sup> Prof Jan Verbakel PhD,<sup>7,8</sup> Constantinos Koshiaris PhD,<sup>8</sup> Nahya Salim PhD,<sup>9,10</sup> Yoel Lubell PhD,<sup>2,11</sup> Paul Turner PhD\*\*,<sup>1,2</sup> Kristina Keitel PhD\*\*<sup>4,12</sup>

\* Contributed equally

\*\* Contributed equally

1. Cambodia Oxford Medical Research Unit, Angkor Hospital for Children, Cambodia
2. Centre for Tropical Medicine and Global Health, University of Oxford, UK
3. Unisanté, Centre for Primary Care and Public Health, University of Lausanne, Switzerland
4. Swiss Tropical and Public Health Institute (SwissTPH), Basel, Switzerland
5. University of Basel, Basel, Switzerland
6. Department of Women and Children's Health, King's College London, London, UK
7. Academic Centre of General Practice, University of Leuven, Leuven, Belgium
8. Nuffield Department of Primary Care Health Sciences, University of Oxford, Oxford, UK
9. Ifakara Health Institute, Dar es Salaam, United Republic of Tanzania
10. Department of Pediatrics and Child Health, Muhimbili University Health and Allied Sciences (MUHAS), Dar es Salaam, United Republic of Tanzania
11. Mahidol-Oxford Tropical Medicine Research Unit, Wellcome Trust Thailand Africa and Asia Programme
12. Division of Emergency Medicine, Department of Pediatrics, Inselspital Bern, Switzerland

### Corresponding author

Dr. Arjun Chandna  
Cambodia Oxford Medical Research Unit  
Angkor Hospital for Children  
Siem Reap  
Cambodia  
Email: [arjun@tropmedres.ac](mailto:arjun@tropmedres.ac)  
Tel: +855-85-712-586

## S1 Appendix

Table 1. Search strategy built following Cochrane Prognosis Methods Group recommendations<sup>1</sup> and adapting published search strings.<sup>2-4</sup>

|   | MEDLINE                                                                                                                                                                                                                                                                                                                                                                                                                                                                                                                                                                                                                                                                                                                                                                                  | Embase                                                                                                                                                                                                                                                                                                                                                                                                                                                                                                                                                                                                                                                  | Science Citation Index via Web of Science                                                                                                                                                                                                                                                                                                                                                                                                                                                                                                                                          |
|---|------------------------------------------------------------------------------------------------------------------------------------------------------------------------------------------------------------------------------------------------------------------------------------------------------------------------------------------------------------------------------------------------------------------------------------------------------------------------------------------------------------------------------------------------------------------------------------------------------------------------------------------------------------------------------------------------------------------------------------------------------------------------------------------|---------------------------------------------------------------------------------------------------------------------------------------------------------------------------------------------------------------------------------------------------------------------------------------------------------------------------------------------------------------------------------------------------------------------------------------------------------------------------------------------------------------------------------------------------------------------------------------------------------------------------------------------------------|------------------------------------------------------------------------------------------------------------------------------------------------------------------------------------------------------------------------------------------------------------------------------------------------------------------------------------------------------------------------------------------------------------------------------------------------------------------------------------------------------------------------------------------------------------------------------------|
| 1 | Fever[MeSH Terms] OR Fever[Title/Abstract] OR Febrile[Title/Abstract] OR "suspected sepsis"[Title/Abstract]                                                                                                                                                                                                                                                                                                                                                                                                                                                                                                                                                                                                                                                                              | fever/ or (fever* or febrile or suspected sepsis).ti,ab,kw.                                                                                                                                                                                                                                                                                                                                                                                                                                                                                                                                                                                             | TS=(fever* or febrile or "suspected sepsis")                                                                                                                                                                                                                                                                                                                                                                                                                                                                                                                                       |
| 2 | pediatrics[MeSH Terms] OR pediatric*[Title/Abstract] OR paediatric*[Title/Abstract] OR child[MeSH Terms] OR child*[Title/Abstract] OR Infant[Mesh:NoExp] OR infant[Title/Abstract]                                                                                                                                                                                                                                                                                                                                                                                                                                                                                                                                                                                                       | pediatrics/ or child/ or infant/ or preschool child/ or school child/ or toddler/ or boy/ or girl/ or (pediatric* or paediatric* or child* or infant*).mp.                                                                                                                                                                                                                                                                                                                                                                                                                                                                                              | TS=(pediatric* or paediatric* or child* or infant*)                                                                                                                                                                                                                                                                                                                                                                                                                                                                                                                                |
| 3 | (((((((Validat*[tw] OR Predict*[ti] OR Rule*[tw]) OR (Predict*[tw] AND (Outcome*[tw] OR Risk*[tw] OR Model*[tw])) OR ((History OR Variable*[tw] OR Criteria OR Scor*[tw] OR Characteristic*[tw] OR Finding*[tw] OR Factor*[tw]) AND (Predict*[tw] OR Model*[tw] OR Decision*[tw] OR Identif*[tw] OR Prognos*[tw])) OR (Decision*[tw] AND (Model*[tw] OR Clinical*[tw] OR "Logistic Models"[MeSH Terms])) OR (Prognostic AND (History OR Variable*[tw] OR Criteria OR Scor*[tw] OR Characteristic*[tw] OR Finding*[tw] OR Factor*[tw] OR Model*[tw]))) OR ("Stratification" OR "ROC Curve"[MeSH Terms] OR "Discrimination" OR "Discriminate" OR "c-statistic" OR "c statistic" OR "Area under the curve" OR "AUC" OR "Calibration" OR "Indices" OR "Algorithm" OR "Multivariable")))))))) | predict*.ti. or (validat* or rule* or (predict and (outcome* or risk* or model*)) or ((history or variable or criteria or scor* or characteristic* or finding* or factor*) and (predict* or model* or decision* or identif* or prognos*)) or (decision* and (model* or clinical*)) or (prognostic and (history or variable* or criteria or scor* or characteristic* or finding* or factor* or model*)) or stratification or discrimination or discriminate or c-statistic or "c statistic" or auc or calibration or indices or algorithm or multivariable).mp. or statistical model/ or "receiver operating characteristic"/ or "area under the curve"/ | TI=(predict*) OR TS=(validat* or rule*) OR TS=((predict and (outcome* or risk* or model*)) OR TS=((history or variable or criteria or scor* or characteristic* or finding* or factor*) and (predict* or model* or decision* or identif* or prognos*)) OR TS=((decision* and (model* or clinical*)) OR TS=((prognostic and (history or variable* or criteria or scor* or characteristic* or finding* or factor* or model*)) OR TS=(stratification or discrimination or discriminate or c-statistic or "c statistic" or auc or calibration or indices or algorithm or multivariable) |
| 4 | death[MeSH Terms] OR death[Title/Abstract] OR mortality[MeSH Terms] OR mortality[Title/Abstract] OR systemic inflammatory response syndrome[MeSH Terms] OR "systemic inflammatory response syndrome"[Title/Abstract] OR SIRS[Title/Abstract] OR sepsis[Title/Abstract] OR septic*[Title/Abstract] OR "severe disease**"[Title/Abstract] OR "severe infection**"[Title/Abstract] OR "severe bacterial infection**"[Title/Abstract] OR "severe illness"[Title/Abstract] OR "severe febrile illness"[Title/Abstract] OR "serious disease**"[Title/Abstract] OR "serious infection**"[Title/Abstract] OR "serious bacterial infection**"[Title/Abstract] OR "serious illness"[Title/Abstract] OR "serious febrile illness"[Title/Abstract]                                                   | mortality/ or childhood mortality/ or infant mortality/ or exp mortality rate/ or death/ or child death/ or fatality/ sepsis/ or systemic inflammatory response syndrome/ or exp septic shock/ or septicemia/ or (death or mortality or systemic inflammatory response or sirs or sepsis or septic* or ((severe or serious) adj2 (disease or illness* or infection*))).mp.                                                                                                                                                                                                                                                                              | TS=(death or mortality or "systemic inflammatory response" or sirs or sepsis or septic*) OR TS=((severe or serious) NEAR/2 (disease or illness* or infection*))                                                                                                                                                                                                                                                                                                                                                                                                                    |
| 5 | 1 AND 2 AND 3 AND 4                                                                                                                                                                                                                                                                                                                                                                                                                                                                                                                                                                                                                                                                                                                                                                      | 1 and 2 and 3 and 4                                                                                                                                                                                                                                                                                                                                                                                                                                                                                                                                                                                                                                     | #4 AND #3 AND #2 AND #1                                                                                                                                                                                                                                                                                                                                                                                                                                                                                                                                                            |
| 6 | ("1999/05/31"[Date - Publication] : "2020/04/30"[Date - Publication])                                                                                                                                                                                                                                                                                                                                                                                                                                                                                                                                                                                                                                                                                                                    | conference*.pt.                                                                                                                                                                                                                                                                                                                                                                                                                                                                                                                                                                                                                                         | #4 AND #3 AND #2 AND #1 Refined by: PUBLICATION YEARS: ( 2020 OR 2019 OR 2010 OR 2002 OR 2018 OR 2009 OR 2001 OR 2017 OR 2008 OR 2000 OR 2016 OR 2007 OR 1999 OR 2015 OR 2006 OR 2014 OR 2005 OR 2013 OR 2004 OR 2012 OR 2003 OR 2011 )                                                                                                                                                                                                                                                                                                                                            |
| 7 | 5 AND 6                                                                                                                                                                                                                                                                                                                                                                                                                                                                                                                                                                                                                                                                                                                                                                                  | 5 not 6                                                                                                                                                                                                                                                                                                                                                                                                                                                                                                                                                                                                                                                 | #4 AND #3 AND #2 AND #1 Refined by: PUBLICATION YEARS: ( 2020 OR 2019 OR 2010 OR 2002 OR 2018 OR 2009 OR 2001 OR 2017 OR 2008 OR 2000 OR 2016 OR 2007 OR 1999 OR 2015 OR 2006 OR 2014 OR 2005 OR 2013 OR 2004 OR 2012 OR 2003 OR 2011 ) AND [excluding] DOCUMENT TYPES: ( MEETING ABSTRACT OR PROCEEDINGS PAPER )                                                                                                                                                                                                                                                                  |

## S2 Appendix

**Table 2. Membership of the Technical Advisory Panel (domain experts) responsible for peer-reviewing the search strategy, identifying omitted articles and suggesting key authors whose publication lists were reviewed.**

| Technical Advisory Panel member | Affiliation                                                                                                                                                                                                | Key authors proposed by Technical Advisory Panel                                                                                                                                                                                                                                                                                                                                           |
|---------------------------------|------------------------------------------------------------------------------------------------------------------------------------------------------------------------------------------------------------|--------------------------------------------------------------------------------------------------------------------------------------------------------------------------------------------------------------------------------------------------------------------------------------------------------------------------------------------------------------------------------------------|
| Dr. Jalemba Aluvaala            | Paediatrics and Child Health, University of Nairobi, Nairobi, Kenya; KEMRI-Wellcome Trust Research Programme, Nairobi, Kenya                                                                               | Ambrose Agweyu<br>Andre Siqueira<br>Anna Seale<br>Anthony Scott<br>Christopher C Moore<br>Climent Casals-Pascual<br>Elizabeth Molyneux<br>Henriette Moll<br>Kathryn Maitland<br>Jay Berkeley<br>Elizabeth Molyneux<br>Quique Bassat<br>Kristina E Rudd<br>Martin Otyek Opio<br>Michaëla A M Huson<br>Mike English<br>Mike Levin<br>Ruud Nijman<br>Samuel Akech<br>Tim Baker<br>Trevor Duke |
| Professor Quique Bassat         | Centro de Investigação em Saúde de Manhiça, Maputo, Mozambique; ISGlobal, Hospital Clínic-Universitat de Barcelona, Barcelona, Spain; Institució Catalana de Recerca i Estudis Avançats, Barcelona, Spain. |                                                                                                                                                                                                                                                                                                                                                                                            |
| Dr. David Bell                  | Foundation for Innovative New Diagnostics (FIND), Campus Biotech, Building B, Level 0, Chemin des Mines 9, 1202, Geneva, Switzerland.                                                                      |                                                                                                                                                                                                                                                                                                                                                                                            |
| Professor John Crump            | Division of Infectious Diseases and International Health, Duke University Medical Center, Durham, North Carolina; Centre for International Health, University of Otago, Dunedin, New Zealand.              |                                                                                                                                                                                                                                                                                                                                                                                            |
| Professor W. Conrad Liles       | Department of Medicine, University of Washington, Seattle, WA.                                                                                                                                             |                                                                                                                                                                                                                                                                                                                                                                                            |
| Dr. Rianne Oostenbrink          | Department of General Paediatrics, Erasmus Medical Center Sophia Children's Hospital, Rotterdam, Netherlands.                                                                                              |                                                                                                                                                                                                                                                                                                                                                                                            |
| Dr. Shunmay Yeung               | Clinical Research Department, London School of Hygiene and Tropical Medicine, London, UK; Department of Paediatrics, Imperial College Healthcare NHS Trust, London, UK.                                    |                                                                                                                                                                                                                                                                                                                                                                                            |

## S3 Appendix

Table 3. Data extraction sheet based on the CHARMS and CHARMS-PF checklists

| Domain                          | Item                                                                                                              | General | Applicability | Risk of bias | Extraction |
|---------------------------------|-------------------------------------------------------------------------------------------------------------------|---------|---------------|--------------|------------|
| <b>Study</b>                    | Study label                                                                                                       | YES     | NO            | NO           |            |
|                                 | Year of publication                                                                                               | YES     | NO            | NO           |            |
|                                 | Journal of publication                                                                                            | YES     | NO            | NO           |            |
|                                 | DOI                                                                                                               | YES     | NO            | NO           |            |
| <b>Source of data</b>           | Study design                                                                                                      | YES     | YES           | YES          |            |
|                                 | Target population                                                                                                 | NO      | YES           | NO           |            |
| <b>Participants</b>             | Single center or multi-center                                                                                     | YES     | YES           | YES          |            |
|                                 | Number of centers recruiting                                                                                      | YES     | NO            | NO           |            |
|                                 | Type of centers recruiting                                                                                        | YES     | YES           | YES          |            |
|                                 | Location of study                                                                                                 | YES     | NO            | NO           |            |
|                                 | Recruitment method                                                                                                | YES     | YES           | YES          |            |
|                                 | Recruitment setting                                                                                               | YES     | YES           | YES          |            |
|                                 | Age range                                                                                                         | YES     | YES           | YES          |            |
|                                 | Fever definition + duration                                                                                       | YES     | YES           | YES          |            |
|                                 | Inclusion criteria                                                                                                | YES     | YES           | YES          |            |
|                                 | Exclusion criteria                                                                                                | YES     | YES           | YES          |            |
|                                 | Participant description                                                                                           | YES     | NO            | NO           |            |
|                                 | Study dates                                                                                                       | YES     | YES           | NO           |            |
| <b>Outcomes to be predicted</b> | Prognostic outcome and definition                                                                                 | YES     | YES           | YES          |            |
|                                 | Method of measurement of outcome                                                                                  | NO      | NO            | YES          |            |
|                                 | Same outcome definition for all participants                                                                      | NO      | NO            | YES          |            |
|                                 | Same measurement of outcome for all participants                                                                  | NO      | NO            | YES          |            |
|                                 | Type of outcome (single or combined endpoints?)                                                                   | YES     | YES           | NO           |            |
|                                 | Outcomes assessed without knowledge of the candidate predictor (blinded)?                                         | NO      | NO            | YES          |            |
|                                 | Were candidate prognostic factors part of the outcome (e.g. when using a panel or consensus outcome measurement)? | NO      | NO            | YES          |            |
|                                 | Time of outcome occurrence                                                                                        | YES     | YES           | NO           |            |
| <b>Prognostic factors</b>       | Demographic prognostic factors                                                                                    | YES     | NO            | NO           |            |
|                                 | Anthropometric prognostic factors                                                                                 | YES     | NO            | NO           |            |
|                                 | Socioeconomic prognostic factors                                                                                  | YES     | NO            | NO           |            |
|                                 | Historical (PMH) prognostic factors                                                                               | YES     | NO            | NO           |            |
|                                 | Clinical symptoms (current and historical during the illness) prognostic factors                                  | YES     | NO            | NO           |            |
|                                 | Clinical signs prognostic factors                                                                                 | YES     | NO            | NO           |            |
|                                 | Vital signs prognostic factors                                                                                    | YES     | NO            | NO           |            |
|                                 | Laboratory measures prognostic factors                                                                            | YES     | NO            | NO           |            |
|                                 | Score prognostic factors with definition and weights                                                              | YES     | NO            | NO           |            |
|                                 | Method for measurement of prognostic factors                                                                      | NO      | NO            | YES          |            |

|                                      |                                                                                                                                                                                                                             |     |     |     |  |
|--------------------------------------|-----------------------------------------------------------------------------------------------------------------------------------------------------------------------------------------------------------------------------|-----|-----|-----|--|
|                                      | Method of measurement of PFs is the same for all study participants?                                                                                                                                                        | NO  | NO  | YES |  |
|                                      | Setting of measurement of PF                                                                                                                                                                                                | YES | YES | YES |  |
|                                      | Setting of measurement of PF is the same for all study participants?                                                                                                                                                        | NO  | NO  | YES |  |
|                                      | Timing of prognostic factor measurement                                                                                                                                                                                     | NO  | YES | YES |  |
|                                      | Prognostic factor assessed blinded for outcome?                                                                                                                                                                             | NO  | NO  | YES |  |
|                                      | Handling of prognostic factor in the analysis (continuous, linear, categorised, non-linear transformations)                                                                                                                 | NO  | NO  | YES |  |
| <b>Sample size</b>                   | Number of participants                                                                                                                                                                                                      | YES | NO  | NO  |  |
|                                      | Number of refusals                                                                                                                                                                                                          | NO  | NO  | YES |  |
|                                      | Number of outcomes/events                                                                                                                                                                                                   | YES | NO  | NO  |  |
|                                      | For model studies: Number of outcomes/events in relation to the number of candidate prognostic factors (events per variable)                                                                                                | NO  | NO  | YES |  |
| <b>Missing data</b>                  | Proportion of data on PF available for analysis                                                                                                                                                                             | NO  | NO  | YES |  |
|                                      | Number of participants with missing data for each outcome                                                                                                                                                                   | NO  | NO  | YES |  |
|                                      | Method used for missing data                                                                                                                                                                                                | NO  | NO  | YES |  |
| <b>Analysis</b>                      | Modelling method (linear, logistic, cox, parametric survival, competing risks, regression)                                                                                                                                  | YES | NO  | YES |  |
|                                      | How modelling assumptions were checked (in particular, for time-to-event outcomes and the analysis of hazard ratios, the method for assessing non-proportional hazards (non-constant hazard ratios over time))              | NO  | NO  | YES |  |
|                                      | Method for selection of PF for INCLUSION in multivariable modelling (all considered, preselection of established PF, retain only those significant from univariable analysis)                                               | NO  | NO  | YES |  |
|                                      | Method for selection of PF DURING multivariable modelling                                                                                                                                                                   | NO  | NO  | YES |  |
|                                      | Inclusion of additional PF (not measured at admission or not included in above categories) for multivariable modelling?                                                                                                     | NO  | YES | YES |  |
|                                      | Criteria used for any selection or exclusion of PF DURING multivariable modelling (P value, Akaike info criterion)                                                                                                          | NO  | NO  | YES |  |
|                                      | Method of handling each continuous PF (dichotomisation, categorisation, linear, non-linear), including values of any cut-points used and their justification for non-linear relationships (splines, fractional polynomials) | NO  | NO  | YES |  |
| <b>Results</b>                       | Unadjusted effect estimates for each PF                                                                                                                                                                                     | YES | NO  | NO  |  |
|                                      | Adjusted effect estimates for each PF                                                                                                                                                                                       | YES | NO  | NO  |  |
| <b>Interpretation and discussion</b> | Interpretation of presented results                                                                                                                                                                                         | YES | YES | YES |  |
|                                      | Comparison with other studies                                                                                                                                                                                               | YES | YES | NO  |  |
|                                      | Discussion of generalisability                                                                                                                                                                                              | YES | YES | NO  |  |
|                                      | Strengths                                                                                                                                                                                                                   | YES | YES | YES |  |
|                                      | Limitations                                                                                                                                                                                                                 | YES | YES | YES |  |

## S4 Appendix

**Table 4. Cut-points for clinical prediction models evaluated in the included studies associated with rule-in (positive likelihood ratio  $\geq 5.0$ ) or rule-out (negative likelihood ratio  $\leq 0.2$ ) value for progression to severe disease.**

| Model                 | Study           | Outcome                                | Model score range | Cut-point to rule-in | PLR   | NLR  | Cut-point to rule-out | PLR   | NLR  |
|-----------------------|-----------------|----------------------------------------|-------------------|----------------------|-------|------|-----------------------|-------|------|
| AQUAMAT               | George 2015     | In-hospital mortality (48h)            | 0-5               | $\geq 4$             | 8.24  | 0.94 |                       |       |      |
| FEAST-PET             | George 2015     | In-hospital mortality (48h)            | 0-10              | $\geq 6$             | 7.95  | 0.54 | $\geq 3$              | 1.36  | 0.10 |
| LODS                  | George 2015     | In-hospital mortality (48h)            | 0-3               |                      |       |      | $\geq 1$              | 1.13  | 0.00 |
| LODS <sup>a</sup>     | Conroy 2015     | In-hospital mortality                  | 0-3               | $> 1$                | 6.49  | 0.21 |                       |       |      |
| PEDIA-i               | George 2015     | In-hospital mortality (48h)            | 0-13              | $\geq 10$            | 5.43  | 0.94 | $\geq 4$              | 1.29  | 0.00 |
| PEDIA-e               | George 2015     | In-hospital mortality (48h)            | 0-9               | $\geq 5$             | 6.38  | 0.92 | $\geq 1$              | 1.03  | 0.00 |
| PEDIA-l               | George 2015     | In-hospital mortality (48h)            | 0-7               | $\geq 4$             | 7.87  | 0.94 | $\geq 1$              | 1.02  | 0.00 |
| PEWS                  | George 2015     | In-hospital mortality (48h)            | 0-19              | $\geq 15$            | 5.66  | 0.97 | $\geq 1$              | 1.00  | 0.00 |
| PRISM III             | George 2015     | In-hospital mortality (48h)            | 0-24              | $\geq 6$             | 5.70  | 0.58 |                       |       |      |
| qPELOD-2 <sup>*</sup> | van Nassau 2018 | In-hospital mortality or PICU transfer | 0-3               | $\geq 2$             | 17.08 | 0.79 |                       |       |      |
| qSOFA <sup>*</sup>    | van Nassau 2018 | In-hospital mortality or PICU transfer | 0-3               | $\geq 2$             | 7.46  | 0.54 |                       |       |      |
| YOS                   | Walia 2016      | Mortality                              | 6-30              | $> 21$               | 6.23  | 0.11 | $> 21^{\dagger}$      | 6.23  | 0.11 |
| YOS                   | Walia 2016      | Mechanical ventilation                 | 6-30              | $> 21$               | 12.05 | 0.00 | $> 21^{\dagger}$      | 12.05 | 0.00 |

NLR = negative likelihood ratio; PICU = pediatric intensive care unit; PLR = positive likelihood ratio

<sup>\*</sup>Positive and negative likelihood ratios calculated from sensitivity and specificity provided in original manuscript; <sup>†</sup>For the Walia et al. study the same cut-point of  $> 21$  was associated with a PLR  $\geq 5.0$  and NLR  $\leq 0.2$ .

## S5 Appendix

**Table 5a. Unadjusted likelihood ratios for prognostic factors judged to be of limited value (neither positive likelihood ratio  $\geq 5.0$  nor negative likelihood ratio  $\leq 0.2$  found in any study) to identify children at risk of progressing to severe febrile illness ('hard' outcomes).**

| Study                 | Cohort              | Outcome                      | Prev.      | Prognostic factor | Definition / Cut-off        | PLR         | 95% CI               | NLR         | 95% CI               |
|-----------------------|---------------------|------------------------------|------------|-------------------|-----------------------------|-------------|----------------------|-------------|----------------------|
| <b>Demographic</b>    |                     |                              |            |                   |                             |             |                      |             |                      |
| <u>Kwizera 2019</u>   | <u>Hospitalised</u> | <u>In-hospital mortality</u> | <u>1.5</u> | <u>Age</u>        | <u>&lt; 12m</u>             | <u>0.97</u> | <u>(0.27 – 3.52)</u> | <u>1.01</u> | <u>(0.81 – 1.25)</u> |
| <u>Kwizera 2019</u>   | <u>Hospitalised</u> | <u>In-hospital mortality</u> | <u>1.5</u> | <u>Age</u>        | <u>1y to &lt; 5y</u>        | <u>0.69</u> | <u>(0.34 – 1.40)</u> | <u>1.33</u> | <u>(0.90 – 1.98)</u> |
| <u>Kwizera 2019</u>   | <u>Hospitalised</u> | <u>In-hospital mortality</u> | <u>1.5</u> | <u>Age</u>        | <u>5y to &lt; 12y</u>       | <u>1.41</u> | <u>(0.69 – 2.87)</u> | <u>0.86</u> | <u>(0.58 – 1.27)</u> |
| <u>Kwizera 2019</u>   | <u>Hospitalised</u> | <u>In-hospital mortality</u> | <u>1.5</u> | <u>Age</u>        | <u>12y to &lt; 18y</u>      | <u>1.76</u> | <u>(0.48 – 6.46)</u> | <u>0.93</u> | <u>(0.75 – 1.16)</u> |
| Scott 2017            | Hospital OPD/ED     | 30-day mortality             | 1.9        | Age               | 13y to 17y                  | 0.57        | (0.20 - 1.67)        | 1.11        | (0.96 - 1.29)        |
| Scott 2017            | Hospital OPD/ED     | 30-day mortality             | 1.9        | Age               | 6y to < 13y                 | 1.21        | (0.71 - 2.06)        | 0.91        | (0.68 - 1.22)        |
| Scott 2017            | Hospital OPD/ED     | 30-day mortality             | 1.9        | Age               | 12m to < 6y                 | 1.15        | (0.76 - 1.73)        | 0.90        | (0.61 - 1.31)        |
| Scott 2017            | Hospital OPD/ED     | 30-day mortality             | 1.9        | Age               | < 12m                       | 0.53        | (0.08 - 3.66)        | 1.04        | (0.96 - 1.13)        |
| Conroy 2015           | Hospitalised        | In-hospital mortality        | 4.7        | Age               | < 12m                       | 1.16        | (0.88 - 1.52)        | 0.93        | (0.80 - 1.08)        |
| Mtove 2011            | Hospitalised        | In-hospital mortality        | 5.0        | Age               | < 12m                       | 1.47        | (1.22 - 1.78)        | 0.81        | (0.71 - 0.92)        |
| Nadjm 2013            | Hospitalised        | In-hospital mortality        | 5.1        | Age               | < 12m                       | 1.42        | (1.19 - 1.70)        | 0.81        | (0.71 - 0.93)        |
| Nadjm 2013            | Hospitalised        | In-hospital mortality        | 5.1        | Age               | < 24m                       | 1.20        | (1.10 - 1.30)        | 0.63        | (0.47 - 0.83)        |
| Aramburo 2018         | Hospitalised        | In-hospital mortality (72h)  | 10.3       | Age               | < 12m                       | 1.47        | (1.20 - 1.79)        | 0.90        | (0.83 - 0.96)        |
| <u>Kwizera 2019</u>   | <u>Hospitalised</u> | <u>In-hospital mortality</u> | <u>1.5</u> | <u>Sex</u>        | <u>Female</u>               | <u>0.87</u> | <u>(0.47 -1.60)</u>  | <u>1.12</u> | <u>(0.88 – 1.06)</u> |
| Scott 2017            | Hospital OPD/ED     | 30-day mortality             | 1.9        | Sex               | Female                      | 1.05        | (0.67 - 1.64)        | 0.97        | (0.68 - 1.37)        |
| Conroy 2015           | Hospitalised        | In-hospital mortality        | 4.7        | Sex               | Female                      | 0.97        | (0.77 - 1.22)        | 1.02        | (0.86 - 1.23)        |
| <u>Lowlaavar 2016</u> | <u>Hospitalised</u> | <u>In-hospital mortality</u> | <u>5.0</u> | <u>Sex</u>        | <u>Female</u>               | <u>1.02</u> | <u>(0.78 – 1.34)</u> | <u>0.98</u> | <u>(0.78 – 1.23)</u> |
| George 2015           | Hospitalised        | In-hospital mortality (48h)  | 9.9        | Sex               | Female                      | 1.01        | (0.89 - 1.15)        | 0.99        | (0.89 - 1.10)        |
| Aramburo 2018         | Hospitalised        | In-hospital mortality (72h)  | 10.3       | Sex               | Female                      | 1.04        | (0.91 - 1.17)        | 0.97        | (0.87 - 1.08)        |
| <b>Anthropometric</b> |                     |                              |            |                   |                             |             |                      |             |                      |
| George 2015           | Hospitalised        | In-hospital mortality (48h)  | 9.9        | Weight            | < 6kg                       | 1.57        | (0.92 - 2.68)        | 0.98        | (0.96 - 1.01)        |
| George 2015           | Hospitalised        | In-hospital mortality (48h)  | 9.9        | Weight            | < 8kg                       | 1.29        | (1.06 - 1.58)        | 0.92        | (0.86 - 0.99)        |
| <b>Historical</b>     |                     |                              |            |                   |                             |             |                      |             |                      |
| Scott 2017            | Hospital OPD/ED     | 30-day mortality             | 1.9        | Medical history   | Non-oncological comorbidity | 1.06        | (0.68 - 1.66)        | 0.96        | (0.67 - 1.36)        |
| Scott 2017            | Hospital OPD/ED     | 30-day mortality             | 1.9        | Medical history   | Oncological comorbidity     | 1.73        | (1.17 - 2.54)        | 0.69        | (0.46 - 1.03)        |
| Scott 2014            | Hospital OPD/ED     | 24-hour organ dysfunction    | 5.4        | Medical history   | Immunosuppressed            | 4.64        | (1.79 - 12.00)       | 0.74        | (0.52 - 1.07)        |

| Clinical symptoms |                 |                                            |      |                           |                                               |      |                  |      |                 |
|-------------------|-----------------|--------------------------------------------|------|---------------------------|-----------------------------------------------|------|------------------|------|-----------------|
| Conroy 2015       | Hospitalised    | In-hospital mortality                      | 4.7  | Convulsions               | Caretaker history                             | 1.90 | ( 1.41 - 2.54 )  | 0.81 | ( 0.70 - 0.93 ) |
| Aramburo 2018     | Hospitalised    | In-hospital mortality (72h)                | 10.3 | Convulsions               | Caretaker history                             | 1.39 | ( 1.05 - 1.84 )  | 0.95 | ( 0.90 - 1.00 ) |
| George 2015       | Hospitalised    | In-hospital mortality (48h)                | 9.9  | Fever                     | Caretaker history                             | 1.00 | ( 0.99 - 1.01 )  | 1.42 | ( 0.32 - 6.25 ) |
| Aramburo 2018     | Hospitalised    | In-hospital mortality (72h)                | 10.3 | Urine looks dark          | Caretaker history                             | 1.04 | ( 0.76 - 1.41 )  | 0.99 | ( 0.95 - 1.04 ) |
| Clinical signs    |                 |                                            |      |                           |                                               |      |                  |      |                 |
| van Nassau 2018   | Hospitalised    | PICU transfer and/or in-hospital mortality | 2.7  | Abnormal temperature      | > 38.5°C or < 36°C                            | 1.43 | ( 0.93 - 2.20 )  | 0.77 | ( 0.50 - 1.17 ) |
| Conroy 2015       | Hospitalised    | In-hospital mortality                      | 4.7  | Hyperthermia              | Temperature > 38°C                            | 0.59 | ( 0.42 - 0.82 )  | 1.34 | ( 1.18 - 1.51 ) |
| George 2015       | Hospitalised    | In-hospital mortality (48h)                | 9.9  | Hyperthermia              | Axillary temperature > 37°C                   | 0.72 | ( 0.66 - 0.80 )  | 2.24 | ( 1.92 - 2.62 ) |
| Aramburo 2018     | Hospitalised    | In-hospital mortality (72h)                | 10.3 | Hyperthermia              | Axillary temperature > 39°C                   | 0.60 | ( 0.45 - 0.79 )  | 1.13 | ( 1.07 - 1.19 ) |
| Conroy 2015       | Hospitalised    | In-hospital mortality                      | 4.7  | Hypothermia               | Temperature < 36°C                            | 3.16 | ( 1.73 - 5.77 )  | 0.92 | ( 0.86 - 0.99 ) |
| Aramburo 2018     | Hospitalised    | In-hospital mortality (72h)                | 10.3 | Hypothermia               | Axillary temperature < 36°C                   | 3.47 | ( 2.58 - 4.67 )  | 0.87 | ( 0.83 - 0.92 ) |
| van Nassau 2018   | Hospitalised    | PICU transfer and/or in-hospital mortality | 2.7  | Heart rate                | Age-adjusted                                  | 1.98 | ( 1.33 - 2.94 )  | 0.63 | ( 0.40 - 0.99 ) |
| Conroy 2015       | Hospitalised    | In-hospital mortality                      | 4.7  | Heart rate                | Age-adjusted                                  | 0.92 | ( 0.77 - 1.09 )  | 1.15 | ( 0.90 - 1.46 ) |
| George 2015       | Hospitalised    | In-hospital mortality (48h)                | 9.9  | Heart rate                | ≥ 200bpm                                      | 4.61 | ( 1.99 - 10.67 ) | 0.98 | ( 0.96 - 1.00 ) |
| Aramburo 2018     | Hospitalised    | In-hospital mortality (72h)                | 10.3 | Heart rate                | Age-adjusted                                  | 0.74 | ( 0.66 - 0.82 )  | 1.69 | ( 1.47 - 1.93 ) |
| Conroy 2015       | Hospitalised    | In-hospital mortality                      | 4.7  | Capillary refill time     | ≥ 3s                                          | 4.67 | ( 3.00 - 7.28 )  | 0.83 | ( 0.75 - 0.92 ) |
| Scott 2014        | Hospital OPD/ED | 24-hour organ dysfunction                  | 5.4  | Capillary refill time     | Flash or > 2s                                 | 0.50 | ( 0.07 - 3.35 )  | 1.09 | ( 0.92 - 1.29 ) |
| George 2015       | Hospitalised    | In-hospital mortality (48h)                | 9.9  | Capillary refill time     | > 2s                                          | 1.28 | ( 1.21 - 1.35 )  | 0.48 | ( 0.37 - 0.62 ) |
| Aramburo 2018     | Hospitalised    | In-hospital mortality (72h)                | 10.3 | Capillary refill time     | < 2s                                          | 0.50 | ( 0.39 - 0.65 )  | 1.26 | ( 1.19 - 1.33 ) |
| Aramburo 2018     | Hospitalised    | In-hospital mortality (72h)                | 10.3 | Capillary refill time     | ≥ 3s                                          | 1.98 | ( 1.73 - 2.27 )  | 0.69 | ( 0.62 - 0.77 ) |
| Aramburo 2018     | Hospitalised    | In-hospital mortality (72h)                | 10.3 | Capillary refill time     | 2-3s                                          | 0.84 | ( 0.72 - 0.99 )  | 1.11 | ( 1.02 - 1.22 ) |
| Scott 2014        | Hospital OPD/ED | 24-hour organ dysfunction                  | 5.4  | Poor peripheral perfusion | Cold extremity                                | 4.35 | ( 0.52 - 36.17 ) | 0.94 | ( 0.80 - 1.10 ) |
| George 2015       | Hospitalised    | In-hospital mortality (48h)                | 9.9  | Poor peripheral perfusion | Limb-core temp. gradient                      | 1.34 | ( 1.25 - 1.44 )  | 0.54 | ( 0.44 - 0.67 ) |
| Aramburo 2018     | Hospitalised    | In-hospital mortality (72h)                | 10.3 | Poor peripheral perfusion | Limb-core temp. gradient                      | 1.32 | ( 1.23 - 1.42 )  | 0.57 | ( 0.47 - 0.70 ) |
| van Nassau 2018   | Hospitalised    | PICU transfer and/or in-hospital mortality | 2.7  | Respiratory rate          | Age-adjusted                                  | 1.11 | ( 0.93 - 1.33 )  | 0.62 | ( 0.22 - 1.78 ) |
| Conroy 2015       | Hospitalised    | In-hospital mortality                      | 4.7  | Respiratory rate          | Age-adjusted                                  | 2.05 | ( 1.66 - 2.53 )  | 0.66 | ( 0.54 - 0.80 ) |
| Conroy 2015       | Hospitalised    | In-hospital mortality                      | 4.7  | Respiratory distress      | Subcostal recession                           | 3.76 | ( 3.18 - 4.45 )  | 0.41 | ( 0.31 - 0.54 ) |
| George 2015       | Hospitalised    | In-hospital mortality (48h)                | 9.9  | Respiratory distress      | Chest wall retraction                         | 1.15 | ( 1.07 - 1.23 )  | 0.70 | ( 0.56 - 0.86 ) |
| George 2015       | Hospitalised    | In-hospital mortality (48h)                | 9.9  | Respiratory distress      | Increased work of breathing or deep breathing | 1.13 | ( 1.09 - 1.17 )  | 0.43 | ( 0.29 - 0.63 ) |
| Aramburo 2018     | Hospitalised    | In-hospital mortality (72h)                | 10.3 | Respiratory distress      | Increased work of breathing or deep breathing | 1.12 | ( 1.08 - 1.16 )  | 0.48 | ( 0.34 - 0.69 ) |



|                   |                 |                                            |      |                      |                                    |      |                  |      |                 |
|-------------------|-----------------|--------------------------------------------|------|----------------------|------------------------------------|------|------------------|------|-----------------|
| George 2015       | Hospitalised    | In-hospital mortality (48h)                | 9.9  | Respiratory crackles | Physician assessment               | 1.82 | ( 1.54 - 2.14 )  | 0.79 | ( 0.72 - 0.86 ) |
| Aramburo 2018     | Hospitalised    | In-hospital mortality (72h)                | 10.3 | Respiratory crackles | Physician assessment               | 1.81 | ( 1.53 - 2.13 )  | 0.80 | ( 0.73 - 0.87 ) |
| Kwizera 2019      | Hospitalised    | In-hospital mortality                      | 1.5  | Focus of infection   | Meningeal                          | 2.71 | ( 0.17 - 43.95 ) | 0.98 | ( 0.89 - 1.08 ) |
| Kwizera 2019      | Hospitalised    | In-hospital mortality                      | 1.5  | Focus of infection   | Respiratory                        | 0.50 | ( 0.14 - 1.81 )  | 1.20 | ( 0.97 - 1.49 ) |
| Kwizera 2019      | Hospitalised    | In-hospital mortality                      | 1.5  | Focus of infection   | Gastrointestinal                   | 0.56 | ( 0.08 - 3.71 )  | 1.07 | ( 0.92 - 1.23 ) |
| Kwizera 2019      | Hospitalised    | In-hospital mortality                      | 1.5  | Focus of infection   | Urinary                            | 1.69 | ( 0.11-26.71 )   | 0.99 | ( 0.90 - 1.08 ) |
| Kwizera 2019      | Hospitalised    | In-hospital mortality                      | 1.5  | Focus of infection   | Skin and/or soft-tissue            | 3.28 | ( 0.20 -53.88 )  | 0.98 | ( 0.89 - 1.07 ) |
| George 2015       | Hospitalised    | In-hospital mortality (48h)                | 9.9  | Cough                | Physician assessment               | 1.00 | ( 0.93 - 1.08 )  | 1.00 | ( 0.83 - 1.21 ) |
| Scott 2014        | Hospital OPD/ED | 24-hour organ dysfunction                  | 5.4  | Agitation            | Physician assessment               | 4.17 | ( 2.08 - 8.35 )  | 0.61 | ( 0.37 - 1.00 ) |
| George 2015       | Hospitalised    | In-hospital mortality (48h)                | 9.9  | Seizures             | Physician assessment               | 1.24 | ( 0.96 - 1.61 )  | 0.96 | ( 0.91 - 1.01 ) |
| Aramburo 2018     | Hospitalised    | In-hospital mortality (72h)                | 10.3 | Normal consciousness | AVPU = Alert (A)                   | 0.29 | ( 0.19 - 0.44 )  | 1.23 | ( 1.18 - 1.28 ) |
| George 2015       | Hospitalised    | In-hospital mortality (48h)                | 9.9  | Vomiting             | Physician assessment               | 1.14 | ( 1.03 - 1.27 )  | 0.85 | ( 0.74 - 0.98 ) |
| George 2015       | Hospitalised    | In-hospital mortality (48h)                | 9.9  | Dehydration          | Decreased skin turgor              | 2.83 | ( 2.07 - 3.89 )  | 0.90 | ( 0.86 - 0.95 ) |
| Aramburo 2018     | Hospitalised    | In-hospital mortality (72h)                | 10.3 | Dehydration          | Sunken eyes or reduced skin turgor | 2.52 | ( 1.89 - 3.36 )  | 0.89 | ( 0.85 - 0.94 ) |
| Aramburo 2018     | Hospitalised    | In-hospital mortality (72h)                | 10.3 | Jaundice             | Physician assessment               | 1.39 | ( 1.21 - 1.60 )  | 0.82 | ( 0.75 - 0.91 ) |
| George 2015       | Hospitalised    | In-hospital mortality (48h)                | 9.9  | Severe pallor        | Physician assessment               | 1.47 | ( 1.35 - 1.59 )  | 0.56 | ( 0.47 - 0.67 ) |
| Aramburo 2018     | Hospitalised    | In-hospital mortality (72h)                | 10.3 | Severe pallor        | Physician assessment               | 1.53 | ( 1.37 - 1.71 )  | 0.70 | ( 0.62 - 0.80 ) |
| <b>Laboratory</b> |                 |                                            |      |                      |                                    |      |                  |      |                 |
| Nadjm 2013        | Hospitalised    | In-hospital mortality                      | 5.1  | Glucose              | > 5mmol/L                          | 0.56 | ( 0.47 - 0.67 )  | 2.33 | ( 2.02 - 2.68 ) |
| Nadjm 2013        | Hospitalised    | In-hospital mortality                      | 5.1  | Glucose              | 2.5-5mmol/L                        | 1.39 | ( 1.11 - 1.75 )  | 0.88 | ( 0.80 - 0.98 ) |
| Mtove 2011        | Hospitalised    | In-hospital mortality                      | 5.0  | Haemoglobin          | < 4g/dL                            | 1.98 | ( 1.53 - 2.56 )  | 0.83 | ( 0.76 - 0.92 ) |
| Nadjm 2013        | Hospitalised    | In-hospital mortality                      | 5.1  | Haemoglobin          | < 5g/dL                            | 1.93 | ( 1.51 - 2.46 )  | 0.83 | ( 0.75 - 0.92 ) |
| Aramburo 2018     | Hospitalised    | In-hospital mortality (72h)                | 10.3 | Haemoglobin          | < 5g/dL                            | 1.43 | ( 1.24 - 1.64 )  | 0.81 | ( 0.73 - 0.89 ) |
| Aramburo 2018     | Hospitalised    | In-hospital mortality (72h)                | 10.3 | Haemoglobin          | 5-7g/dL                            | 0.90 | ( 0.68 - 1.19 )  | 1.02 | ( 0.97 - 1.07 ) |
| Aramburo 2018     | Hospitalised    | In-hospital mortality (72h)                | 10.3 | Haemoglobin          | 7-10g/dL                           | 0.97 | ( 0.79 - 1.18 )  | 1.01 | ( 0.94 - 1.09 ) |
| Aramburo 2018     | Hospitalised    | In-hospital mortality (72h)                | 10.3 | Haemoglobin          | ≥ 10g/dL                           | 0.56 | ( 0.42 - 0.75 )  | 1.14 | ( 1.09 - 1.20 ) |
| Aramburo 2018     | Hospitalised    | In-hospital mortality (72h)                | 10.3 | Lactate              | < 2.5mmol/L                        | 0.26 | ( 0.17 - 0.37 )  | 1.35 | ( 1.29 - 1.40 ) |
| Aramburo 2018     | Hospitalised    | In-hospital mortality (72h)                | 10.3 | Lactate              | 2.5-5mmol/L                        | 0.45 | ( 0.34 - 0.58 )  | 1.28 | ( 1.21 - 1.35 ) |
| van Nassau 2018   | Hospitalised    | PICU transfer and/or in-hospital mortality | 2.7  | Leukocyte count      | High or low (age-adjusted)         | 0.97 | ( 0.64 - 1.48 )  | 1.03 | ( 0.67 - 1.58 ) |
| George 2015       | Hospitalised    | In-hospital mortality (48h)                | 9.9  | pH                   | < 7.2                              | 4.85 | ( 3.79 - 6.21 )  | 0.70 | ( 0.63 - 0.77 ) |
| Aramburo 2018     | Hospitalised    | In-hospital mortality (72h)                | 10.3 | pH                   | < 7.2                              | 4.43 | ( 3.45 - 5.68 )  | 0.72 | ( 0.65 - 0.79 ) |
| George 2015       | Hospitalised    | In-hospital mortality (48h)                | 9.9  | Urea                 | > 20mg/dL                          | 2.50 | ( 2.08 - 3.00 )  | 0.67 | ( 0.58 - 0.76 ) |

|                         |                 |                             |      |                            |                    |      |                  |      |                 |
|-------------------------|-----------------|-----------------------------|------|----------------------------|--------------------|------|------------------|------|-----------------|
| Aramburo 2018           | Hospitalised    | In-hospital mortality (72h) | 10.3 | Urea                       | > 20mg/dL          | 2.37 | ( 1.97 - 2.84 )  | 0.69 | ( 0.61 - 0.78 ) |
| Aramburo 2018           | Hospitalised    | In-hospital mortality (72h) | 10.3 | Base deficit               | > -8mmol/L         | 1.74 | ( 1.61 - 1.88 )  | 0.31 | ( 0.23 - 0.43 ) |
| Aramburo 2018           | Hospitalised    | In-hospital mortality (72h) | 10.3 | Bicarbonate                | < 15mmol/L         | 2.25 | ( 2.03 - 2.51 )  | 0.40 | ( 0.31 - 0.50 ) |
| <b>Composite scores</b> |                 |                             |      |                            |                    |      |                  |      |                 |
| Scott 2014              | Hospital OPD/ED | 24-hour organ dysfunction   | 5.4  | CRS*                       | ≥ 1                | 2.02 | ( 1.26 - 3.23 )  | 0.55 | ( 0.28 - 1.11 ) |
| Scott 2014              | Hospital OPD/ED | 24-hour organ dysfunction   | 5.4  | CRS*                       | ≥ 2                | 4.35 | ( 1.40 - 13.52 ) | 0.81 | ( 0.60 - 1.10 ) |
| SEAIDCRN 2017           | Hospitalised    | 28-day mortality            | 1.9  | Severe sepsis <sup>†</sup> | Goldstein criteria | 3.08 | ( 2.28 - 4.16 )  | 0.29 | ( 0.11 - 0.79 ) |

AVPU = alert, voice, pain or unresponsive; CI = confidence interval; CRS = Clinical Recognition Signs; ED = emergency department; MUAC = mid-upper arm circumference; NLR = negative likelihood ratio; OPD = outpatient department; PLR = positive likelihood ratio; Prev. = outcome prevalence (%); WAZ = weight-for-age z-score

\*CRS scored out of four variables including mental status, capillary refill time, peripheral pulse character, and presence of cold or mottled extremities);<sup>5</sup>Children with sepsis were enrolled based on modified Goldstein criteria (see Table 1 in main manuscript). Severe sepsis was defined based on Goldstein criteria for severe sepsis.<sup>6</sup>

**Table 5b. Unadjusted likelihood ratios for prognostic factors judged to be of limited value (neither positive likelihood ratio  $\geq 5.0$  nor negative likelihood ratio  $\leq 0.2$  found in any study) to identify children at risk of progressing to severe febrile illness ('soft' outcomes).**

| Study                    | Cohort       | Outcome                   | Prev. | Prognostic factor              | Definition / Cut-off                                      | PLR  | 95% CI          | NLR  | 95% CI          |
|--------------------------|--------------|---------------------------|-------|--------------------------------|-----------------------------------------------------------|------|-----------------|------|-----------------|
| <b>Demographic</b>       |              |                           |       |                                |                                                           |      |                 |      |                 |
| Mwandama 2016            | Primary care | Persistent symptoms at D7 | 10.4  | Sex                            | Female                                                    | 0.87 | ( 0.53 - 1.42 ) | 1.16 | ( 0.73 - 1.83 ) |
| <b>Socioeconomic</b>     |              |                           |       |                                |                                                           |      |                 |      |                 |
| Mwandama 2016            | Primary care | Persistent symptoms at D7 | 10.4  | Household socioeconomic status | Highest wealth quintile                                   | 1.24 | ( 0.89 - 1.73 ) | 0.71 | ( 0.36 - 1.40 ) |
| Mwandama 2016            | Primary care | Persistent symptoms at D7 | 10.4  | Household socioeconomic status | Slept under ITN night prior to enrolment                  | 0.73 | ( 0.49 - 1.07 ) | 2.08 | ( 1.13 - 3.82 ) |
| Mwandama 2016            | Primary care | Persistent symptoms at D7 | 10.4  | Parental education             | None                                                      | 0.71 | ( 0.10 - 5.20 ) | 1.02 | ( 0.91 - 1.15 ) |
| Mwandama 2016            | Primary care | Persistent symptoms at D7 | 10.4  | Parental education             | Primary                                                   | 1.05 | ( 0.82 - 1.34 ) | 0.86 | ( 0.34 - 2.13 ) |
| Mwandama 2016            | Primary care | Persistent symptoms at D7 | 10.4  | Parental education             | Secondary                                                 | 0.92 | ( 0.31 - 2.74 ) | 1.02 | ( 0.83 - 1.25 ) |
| <b>Clinical symptoms</b> |              |                           |       |                                |                                                           |      |                 |      |                 |
| Mwandama 2016            | Primary care | Persistent symptoms at D7 | 10.4  | URTI/cold presentation         | Caretaker history                                         | 1.27 | ( 0.81 - 2.00 ) | 0.79 | ( 0.46 - 1.35 ) |
| Elshout 2015             | Primary care | Persistent fever at D3    | 13.1  | Sore throat                    | Caretaker history                                         | 2.21 | ( 1.39 - 3.51 ) | 0.82 | ( 0.70 - 0.96 ) |
| Elshout 2015             | Primary care | Persistent fever at D3    | 13.1  | Otalgia                        | Caretaker history                                         | 1.51 | ( 0.92 - 2.47 ) | 0.90 | ( 0.78 - 1.05 ) |
| Elshout 2015             | Primary care | Persistent fever at D3    | 13.1  | Otalgia                        | Earache resulting in altered reaction or sleeping pattern | 1.77 | ( 0.85 - 3.68 ) | 0.94 | ( 0.85 - 1.04 ) |
| Elshout 2015             | Primary care | Persistent fever at D3    | 13.1  | Rhinorrhea                     | Caretaker history                                         | 1.19 | ( 0.84 - 1.67 ) | 0.91 | ( 0.74 - 1.12 ) |
| Elshout 2015             | Primary care | Persistent fever at D3    | 13.1  | Cough                          | Caretaker history                                         | 1.20 | ( 0.86 - 1.67 ) | 0.90 | ( 0.73 - 1.11 ) |
| Elshout 2015             | Primary care | Persistent fever at D3    | 13.1  | Moaning respiration            | Caretaker history                                         | 1.27 | ( 1.01 - 1.60 ) | 0.77 | ( 0.56 - 1.05 ) |
| Elshout 2015             | Primary care | Persistent fever at D3    | 13.1  | Abdominal pain                 | Caretaker history                                         | 1.45 | ( 0.87 - 2.42 ) | 0.92 | ( 0.80 - 1.05 ) |
| Elshout 2015             | Primary care | Persistent fever at D3    | 13.1  | Diarrhea > 2/day               | Caretaker history                                         | 1.45 | ( 0.98 - 2.15 ) | 0.87 | ( 0.72 - 1.04 ) |
| Elshout 2015             | Primary care | Persistent fever at D3    | 13.1  | Vomiting                       | Caretaker history                                         | 1.31 | ( 0.95 - 1.81 ) | 0.85 | ( 0.68 - 1.07 ) |
| Elshout 2015             | Primary care | Persistent fever at D3    | 13.1  | Febrile convulsions            | Caretaker history                                         | 2.36 | ( 1.04 - 5.35 ) | 0.93 | ( 0.85 - 1.02 ) |
| Elshout 2015             | Primary care | Persistent fever at D3    | 13.1  | Drowsy or difficult to wake    | Caretaker history                                         | 0.85 | ( 0.63 - 1.15 ) | 1.15 | ( 0.91 - 1.46 ) |
| Elshout 2015             | Primary care | Persistent fever at D3    | 13.1  | Restlessness or confusion      | Caretaker history                                         | 1.09 | ( 0.74 - 1.62 ) | 0.96 | ( 0.80 - 1.15 ) |
| Elshout 2015             | Primary care | Persistent fever at D3    | 13.1  | Feeling irritable              | Caretaker history                                         | 1.31 | ( 0.97 - 1.78 ) | 0.84 | ( 0.66 - 1.06 ) |
| Elshout 2015             | Primary care | Persistent fever at D3    | 13.1  | Inconsolable crying            | Caretaker history                                         | 0.99 | ( 0.75 - 1.32 ) | 1.00 | ( 0.79 - 1.28 ) |
| Elshout 2015             | Primary care | Persistent fever at D3    | 13.1  | Crying during diaper change    | Caretaker history                                         | 0.95 | ( 0.63 - 1.45 ) | 1.02 | ( 0.86 - 1.21 ) |
| Elshout 2015             | Primary care | Persistent fever at D3    | 13.1  | Crying when picked up          | Caretaker history                                         | 0.86 | ( 0.55 - 1.35 ) | 1.06 | ( 0.90 - 1.24 ) |
| Elshout 2015             | Primary care | Persistent fever at D3    | 13.1  | Different illness than usual   | Caretaker history                                         | 1.16 | ( 0.94 - 1.44 ) | 0.81 | ( 0.59 - 1.13 ) |
| Elshout 2015             | Primary care | Persistent fever at D3    | 13.1  | Parental concern               | Caretaker history                                         | 1.51 | ( 0.92 - 2.47 ) | 0.90 | ( 0.78 - 1.05 ) |

|                         |              |                                 |      |                                 |                                                    |      |                 |      |                 |
|-------------------------|--------------|---------------------------------|------|---------------------------------|----------------------------------------------------|------|-----------------|------|-----------------|
| Elshout 2015            | Primary care | Persistent fever at D3          | 13.1 | Drinking less than half usual   | Caretaker history                                  | 1.07 | ( 0.76 - 1.51 ) | 0.96 | ( 0.78 - 1.18 ) |
| Elshout 2015            | Primary care | Persistent fever at D3          | 13.1 | Skin rash                       | Caretaker history                                  | 0.92 | ( 0.54 - 1.59 ) | 1.02 | ( 0.90 - 1.16 ) |
| Elshout 2015            | Primary care | Persistent fever at D3          | 13.1 | Pale, grey or spotted skin      | Caretaker history                                  | 0.91 | ( 0.69 - 1.21 ) | 1.09 | ( 0.85 - 1.39 ) |
| Elshout 2015            | Primary care | Persistent fever at D3          | 13.1 | Normal play behaviour           | Caretaker history                                  | 1.09 | ( 0.89 - 1.34 ) | 0.87 | ( 0.62 - 1.24 ) |
| Elshout 2015            | Primary care | Persistent fever at D3          | 13.1 | Normal reaction to parents      | Caretaker history                                  | 0.70 | ( 0.26 - 1.89 ) | 1.03 | ( 0.96 - 1.11 ) |
| <b>Clinical signs</b>   |              |                                 |      |                                 |                                                    |      |                 |      |                 |
| Mwandama 2016           | Primary care | Persistent symptoms at D7       | 10.4 | Hyperthermia                    | Axillary temperature $\geq 37.5^{\circ}\text{C}$   | 1.64 | ( 1.01 - 2.66 ) | 0.67 | ( 0.39 - 1.15 ) |
| Elshout 2015            | Primary care | Persistent fever at D3          | 13.1 | Hyperthermia                    | Rectal temperature $\geq 38^{\circ}\text{C}$       | 1.47 | ( 1.08 - 2.01 ) | 0.80 | ( 0.63 - 1.00 ) |
| van Nassau 2018         | Hospitalised | Length of stay $\geq 7\text{d}$ | 22.2 | Abnormal temperature            | $> 38.5^{\circ}\text{C}$ or $< 36^{\circ}\text{C}$ | 0.81 | ( 0.63 - 1.04 ) | 1.11 | ( 0.99 - 1.24 ) |
| van Nassau 2018         | Hospitalised | Length of stay $\geq 7\text{d}$ | 22.2 | Heart rate                      | Age-adjusted                                       | 1.67 | ( 1.18 - 2.37 ) | 0.88 | ( 0.80 - 0.97 ) |
| Elshout 2015            | Primary care | Persistent fever at D3          | 13.1 | Capillary refill time           | $> 2\text{s}$                                      | 0.98 | ( 0.35 - 2.71 ) | 1.00 | ( 0.93 - 1.07 ) |
| van Nassau 2018         | Hospitalised | Length of stay $\geq 7\text{d}$ | 22.2 | Respiratory rate                | Age-adjusted                                       | 0.99 | ( 0.89 - 1.10 ) | 1.04 | ( 0.73 - 1.47 ) |
| Elshout 2015            | Primary care | Persistent fever at D3          | 13.1 | Respiratory distress (dyspnoea) | Physician assessment                               | 1.06 | ( 0.71 - 1.58 ) | 0.98 | ( 0.82 - 1.16 ) |
| Elshout 2015            | Primary care | Persistent fever at D3          | 13.1 | Pharyngitis                     | Sign of throat infection                           | 1.64 | ( 1.25 - 2.16 ) | 0.70 | ( 0.54 - 0.91 ) |
| Elshout 2015            | Primary care | Persistent fever at D3          | 13.1 | Rhinorrhoea                     | Physician assessment                               | 0.91 | ( 0.70 - 1.18 ) | 1.11 | ( 0.85 - 1.44 ) |
| Elshout 2015            | Primary care | Persistent fever at D3          | 13.1 | Cough                           | Physician assessment                               | 1.28 | ( 0.95 - 1.72 ) | 0.84 | ( 0.66 - 1.07 ) |
| Elshout 2015            | Primary care | Persistent fever at D3          | 13.1 | Palpable lymph nodes            | Physician assessment                               | 1.39 | ( 1.09 - 1.77 ) | 0.73 | ( 0.54 - 0.98 ) |
| Elshout 2015            | Primary care | Persistent fever at D3          | 13.1 | Meningism                       | Able to put chin to chest                          | 0.34 | ( 0.05 - 2.47 ) | 1.03 | ( 0.99 - 1.07 ) |
| Elshout 2015            | Primary care | Persistent fever at D3          | 13.1 | Ill appearance                  | Physician assessment                               | 1.32 | ( 0.61 - 2.85 ) | 0.97 | ( 0.89 - 1.06 ) |
| <b>Laboratory</b>       |              |                                 |      |                                 |                                                    |      |                 |      |                 |
| van Nassau 2018         | Hospitalised | Length of stay $\geq 7\text{d}$ | 22.2 | Leukocyte count                 | High or low (age-adjusted)                         | 1.15 | ( 0.96 - 1.36 ) | 0.86 | ( 0.70 - 1.06 ) |
| Freyne 2013             | Hospitalised | Length of stay $> 96\text{h}$   | 26.1 | Leukocyte count                 | $> 15,000\text{cells/mm}$                          | 0.97 | ( 0.44 - 2.15 ) | 1.02 | ( 0.57 - 1.82 ) |
| Freyne 2013             | Hospitalised | Length of stay $> 96\text{h}$   | 26.1 | Procalcitonin                   | $> 1.0\text{ng/L}$                                 | 1.00 | ( 0.31 - 3.23 ) | 1.00 | ( 0.68 - 1.48 ) |
| Freyne 2013             | Hospitalised | Length of stay $> 96\text{h}$   | 26.1 | C-reactive protein              | $> 20\text{mg/dL}$                                 | 1.27 | ( 0.61 - 2.64 ) | 0.82 | ( 0.43 - 1.56 ) |
| <b>Composite scores</b> |              |                                 |      |                                 |                                                    |      |                 |      |                 |
| Freyne 2013             | Hospitalised | Length of stay $> 96\text{h}$   | 26.1 | AIOS*                           | $> 10$                                             | 1.00 | ( 0.51 - 1.97 ) | 1.00 | ( 0.51 - 1.97 ) |

AIOS = Acute Infantile Observation Score; CI = confidence interval; ITN = insecticide-treated bednet; NLR = negative likelihood ratio; PLR = positive likelihood ratio; Prev. = outcome prevalence (%)

\*Acute Infantile Observation Score calculated as described for Yale Observation Score (YOS) in webappendix3 Table 3a.

## S6 Appendix

**Table 6a: Risk of bias and applicability assessments for the included clinical prediction model studies (n=7) using PROBAST (Prediction model Risk Of Bias ASsessment Tool). Each prediction model/outcome pair (n=32) is assessed independently.**

| Study           | Clinical prediction model | Outcome                                    | Risk of Bias |          |         |            |              | Applicability |         |            |              |
|-----------------|---------------------------|--------------------------------------------|--------------|----------|---------|------------|--------------|---------------|---------|------------|--------------|
|                 |                           |                                            | Overall      | Analysis | Outcome | Predictors | Participants | Overall       | Outcome | Predictors | Participants |
| George 2015     | FEAST-PET (D)             | In-hospital mortality (48h)                | H            | H        | L       | L          | L            | H             | L       | L          | H            |
| George 2015     | FEAST-PETaL (D)           | In-hospital mortality (48h)                | H            | H        | L       | L          | L            | H             | L       | L          | H            |
| George 2015     | LODS (D)                  | In-hospital mortality (48h)                | H            | H        | L       | L          | L            | H             | L       | L          | H            |
| George 2015     | PEDIA-i (V)               | In-hospital mortality (<4h)                | H            | H        | L       | L          | L            | H             | L       | L          | H            |
| George 2015     | PEDIA-e (V)               | In-hospital mortality (4-48h)              | H            | H        | L       | L          | L            | H             | L       | L          | H            |
| George 2015     | PEDIA-l (V)               | In-hospital mortality (>48h)               | H            | H        | L       | L          | L            | H             | L       | L          | H            |
| George 2015     | PRISM (V)                 | In-hospital mortality (48h)                | H            | H        | L       | L          | L            | H             | L       | L          | H            |
| George 2015     | PEWS (V)                  | In-hospital mortality (48h)                | H            | H        | L       | L          | L            | H             | L       | L          | H            |
| George 2015     | AQUAMAT (V)               | In-hospital mortality (48h)                | H            | H        | L       | L          | L            | H             | L       | L          | H            |
| Conroy 2015     | LODS (V)                  | In-hospital mortality                      | H            | H        | L       | L          | L            | H             | L       | L          | H            |
| Conroy 2015     | SICK (V)                  | In-hospital mortality                      | H            | H        | L       | L          | L            | H             | L       | L          | H            |
| Conroy 2015     | PEDIA-i (V)               | In-hospital mortality                      | H            | H        | L       | L          | L            | H             | L       | L          | H            |
| Lowlaavar 2016  | Model 1 (D)               | In-hospital mortality                      | H            | H        | L       | H          | L            | H             | L       | H          | H            |
| Lowlaavar 2016  | Model 2 (D)               | In-hospital mortality                      | H            | H        | L       | H          | L            | H             | L       | H          | H            |
| Lowlaavar 2016  | Model 3 (D)               | In-hospital mortality                      | H            | H        | L       | H          | L            | H             | L       | H          | H            |
| Walia 2016      | YOS (V)                   | Mortality                                  | H            | H        | L       | L          | U            | H             | L       | L          | H            |
| Walia 2016      | YOS (V)                   | Mechanical ventilation                     | H            | H        | L       | L          | U            | H             | L       | L          | H            |
| van Nassau 2018 | qSOFA (V)                 | PICU transfer and/or in-hospital mortality | H            | H        | L       | L          | L            | H             | L       | L          | H            |
| van Nassau 2018 | qPELOD-2 (V)              | PICU transfer and/or in-hospital mortality | H            | H        | L       | L          | L            | H             | L       | L          | H            |
| van Nassau 2018 | SIRS (V)                  | PICU transfer and/or in-hospital mortality | H            | H        | L       | L          | L            | H             | L       | L          | H            |
| van Nassau 2018 | qSOFA-L (V)               | PICU transfer and/or in-hospital mortality | H            | H        | L       | L          | L            | H             | L       | L          | H            |
| van Nassau 2018 | qSOFA (V)                 | Length of stay $\geq$ 7 days               | H            | H        | L       | L          | L            | H             | L       | L          | H            |
| van Nassau 2018 | qPELOD-2 (V)              | Length of stay $\geq$ 7 days               | H            | H        | L       | L          | L            | H             | L       | L          | H            |
| van Nassau 2018 | SIRS (V)                  | Length of stay $\geq$ 7 days               | H            | H        | L       | L          | L            | H             | L       | L          | H            |

|                 |                |                              |   |   |   |   |   |   |   |   |   |
|-----------------|----------------|------------------------------|---|---|---|---|---|---|---|---|---|
| van Nassau 2018 | qSOFA-L (V)    | Length of stay $\geq$ 7 days | H | H | L | L | L | H | L | L | H |
| Kwizera 2019    | Model 1 (D)    | In-hospital mortality        | H | H | L | H | H | H | L | L | H |
| Kwizera 2019    | Model 2 (D)    | In-hospital mortality        | H | H | L | H | H | H | L | L | H |
| Kwizera 2019    | Model 3 (D)    | In-hospital mortality        | H | H | L | H | H | H | L | L | H |
| Kwizera 2019    | Model 4 (D)    | In-hospital mortality        | H | H | L | H | H | H | L | L | H |
| Kwizera 2019    | Model 5 (D)    | In-hospital mortality        | H | H | L | H | H | H | L | L | H |
| Scott 2020      | Temporal (V)   | Hypotensive shock $\leq$ 24h | H | H | H | L | H | L | L | L | L |
| Scott 2020      | Geographic (V) | Hypotensive shock $\leq$ 24h | H | H | H | L | H | L | L | L | L |

D = derivation; H = high risk/concern; L = low risk/concern; V = validation

**Table 6b. Risk of bias and applicability assessments for included prognostic factor studies (n=11) using the QUIPS (Quality in Prognosis Studies) tool.**

| Study ID       | Risk of Bias |          |             |         |            |           |              | Applicability |         |        |         |            |              |
|----------------|--------------|----------|-------------|---------|------------|-----------|--------------|---------------|---------|--------|---------|------------|--------------|
|                | Overall      | Analysis | Confounding | Outcome | Predictors | Attrition | Participants | Overall       | Setting | Timing | Outcome | Predictors | Participants |
| Elshout 2015   | H            | M        | M           | H       | M          | H         | H            | H             | L       | L      | H       | L          | H            |
| Scott 2012     | H            | L        | H           | M       | L          | L         | H            | H             | L       | H      | L       | L          | H            |
| Scott 2014     | H            | L        | H           | H       | L          | L         | L            | H             | L       | L      | L       | L          | H            |
| Scott 2017     | L            | L        | L           | L       | L          | L         | L            | H             | L       | L      | L       | L          | H            |
| Freyne 2013    | H            | H        | H           | M       | L          | L         | H            | H             | U       | L      | L       | L          | H            |
| Mtove 2011     | M            | L        | M           | L       | L          | L         | L            | H             | H       | L      | L       | L          | L            |
| Nadjm 2013     | M            | M        | M           | L       | L          | L         | L            | H             | H       | L      | L       | L          | L            |
| Aramburo 2018  | M            | L        | M           | L       | L          | L         | L            | H             | H       | L      | L       | L          | H            |
| Costa 2017     | H            | H        | H           | L       | H          | L         | H            | H             | U       | U      | L       | L          | H            |
| Mwandama 2016  | H            | M        | H           | M       | M          | H         | H            | H             | L       | L      | H       | L          | H            |
| SEAI DCRN 2017 | H            | H        | H           | L       | H          | H         | M            | H             | H       | L      | L       | H          | L            |

H = high risk/concern; L = low risk/concern; U = unclear risk/concern

**S7 Appendix****Table 7. Alternate search strategy**

|   | <b>ORIGINAL MEDLINE SEARCH</b>                                                                                                                                                                                                                                                                                                                                                                                                                                                                                                                                                                                                                                                                                                                                                         | <b>ALTERNATE MEDLINE SEARCH</b>                                                                                                                                                                                                                                                                                                                                                                                                                                                                                                                                                                                                                                                                                                                                                        |
|---|----------------------------------------------------------------------------------------------------------------------------------------------------------------------------------------------------------------------------------------------------------------------------------------------------------------------------------------------------------------------------------------------------------------------------------------------------------------------------------------------------------------------------------------------------------------------------------------------------------------------------------------------------------------------------------------------------------------------------------------------------------------------------------------|----------------------------------------------------------------------------------------------------------------------------------------------------------------------------------------------------------------------------------------------------------------------------------------------------------------------------------------------------------------------------------------------------------------------------------------------------------------------------------------------------------------------------------------------------------------------------------------------------------------------------------------------------------------------------------------------------------------------------------------------------------------------------------------|
| 1 | Fever[MeSH Terms] OR Fever[Title/Abstract] OR Febrile[Title/Abstract] OR "suspected sepsis"[Title/Abstract]                                                                                                                                                                                                                                                                                                                                                                                                                                                                                                                                                                                                                                                                            | Fever[MeSH Terms] OR Fever[Title/Abstract] OR Febrile[Title/Abstract] OR "suspected sepsis"[Title/Abstract] OR Hypothermia[MeSH Terms] OR Hypothermia[Title/Abstract] OR "history of fever"[Title/Abstract]                                                                                                                                                                                                                                                                                                                                                                                                                                                                                                                                                                            |
| 2 | pediatrics[MeSH Terms] OR pediatric*[Title/Abstract] OR paediatric*[Title/Abstract] OR child[MeSH Terms] OR child*[Title/Abstract] OR Infant[Mesh:NoExp] OR infant[Title/Abstract]                                                                                                                                                                                                                                                                                                                                                                                                                                                                                                                                                                                                     | pediatrics[MeSH Terms] OR pediatric*[Title/Abstract] OR paediatric*[Title/Abstract] OR child[MeSH Terms] OR child*[Title/Abstract] OR Infant[Mesh:NoExp] OR infant[Title/Abstract]                                                                                                                                                                                                                                                                                                                                                                                                                                                                                                                                                                                                     |
| 3 | (((((Validat*[tw] OR Predict*[ti] OR Rule*[tw]) OR (Predict*[tw] AND (Outcome*[tw] OR Risk*[tw] OR Model*[tw])) OR ((History OR Variable*[tw] OR Criteria OR Scor*[tw] OR Characteristic*[tw] OR Finding*[tw] OR Factor*[tw]) AND (Predict*[tw] OR Model*[tw] OR Decision*[tw] OR Identif*[tw] OR Prognos*[tw])) OR (Decision*[tw] AND (Model*[tw] OR Clinical*[tw] OR "Logistic Models"[MeSH Terms])) OR (Prognostic AND (History OR Variable*[tw] OR Criteria OR Scor*[tw] OR Characteristic*[tw] OR Finding*[tw] OR Factor*[tw] OR Model*[tw]))) OR ("Stratification" OR "ROC Curve"[MeSH Terms] OR "Discrimination" OR "Discriminate" OR "c-statistic" OR "c statistic" OR "Area under the curve" OR "AUC" OR "Calibration" OR "Indices" OR "Algorithm" OR "Multivariable")))))))) | (((((Validat*[tw] OR Predict*[ti] OR Rule*[tw]) OR (Predict*[tw] AND (Outcome*[tw] OR Risk*[tw] OR Model*[tw])) OR ((History OR Variable*[tw] OR Criteria OR Scor*[tw] OR Characteristic*[tw] OR Finding*[tw] OR Factor*[tw]) AND (Predict*[tw] OR Model*[tw] OR Decision*[tw] OR Identif*[tw] OR Prognos*[tw])) OR (Decision*[tw] AND (Model*[tw] OR Clinical*[tw] OR "Logistic Models"[MeSH Terms])) OR (Prognostic AND (History OR Variable*[tw] OR Criteria OR Scor*[tw] OR Characteristic*[tw] OR Finding*[tw] OR Factor*[tw] OR Model*[tw]))) OR ("Stratification" OR "ROC Curve"[MeSH Terms] OR "Discrimination" OR "Discriminate" OR "c-statistic" OR "c statistic" OR "Area under the curve" OR "AUC" OR "Calibration" OR "Indices" OR "Algorithm" OR "Multivariable")))))))) |
| 4 | death[MeSH Terms] OR death[Title/Abstract] OR mortality[MeSH Terms] OR mortality[Title/Abstract] OR systemic inflammatory response syndrome[MeSH Terms] OR "systemic inflammatory response syndrome"[Title/Abstract] OR SIRS[Title/Abstract] OR sepsis[Title/Abstract] OR septic*[Title/Abstract] OR "severe disease**"[Title/Abstract] OR "severe infection**"[Title/Abstract] OR "severe bacterial infection**"[Title/Abstract] OR "severe illness"[Title/Abstract] OR "severe febrile illness"[Title/Abstract] OR "serious disease**"[Title/Abstract] OR "serious infection**"[Title/Abstract] OR "serious bacterial infection**"[Title/Abstract] OR "serious illness"[Title/Abstract] OR "serious febrile illness"[Title/Abstract]                                                 | death[MeSH Terms] OR death[Title/Abstract] OR mortality[MeSH Terms] OR mortality[Title/Abstract] OR "severe disease**"[Title/Abstract] OR "severe infection**"[Title/Abstract] OR "severe bacterial infection**"[Title/Abstract] OR "severe illness"[Title/Abstract] OR "severe febrile illness"[Title/Abstract] OR "serious disease**"[Title/Abstract] OR "serious infection**"[Title/Abstract] OR "serious bacterial infection**"[Title/Abstract] OR "serious illness"[Title/Abstract] OR "serious febrile illness"[Title/Abstract]                                                                                                                                                                                                                                                  |
| 5 | 1 AND 2 AND 3 AND 4                                                                                                                                                                                                                                                                                                                                                                                                                                                                                                                                                                                                                                                                                                                                                                    | 1 AND 2 AND 3 AND 4                                                                                                                                                                                                                                                                                                                                                                                                                                                                                                                                                                                                                                                                                                                                                                    |
| 6 | ("1999/05/31"[Date - Publication] : "2020/04/30"[Date - Publication])                                                                                                                                                                                                                                                                                                                                                                                                                                                                                                                                                                                                                                                                                                                  | ("1999/05/31"[Date - Publication] : "2020/04/30"[Date - Publication])                                                                                                                                                                                                                                                                                                                                                                                                                                                                                                                                                                                                                                                                                                                  |
| 7 | 5 AND 6                                                                                                                                                                                                                                                                                                                                                                                                                                                                                                                                                                                                                                                                                                                                                                                | 5 AND 6                                                                                                                                                                                                                                                                                                                                                                                                                                                                                                                                                                                                                                                                                                                                                                                |

Following suggestions arising during the peer review process we constructed an alternate search strategy which explicitly included the concept of 'hypothermia' and 'history of fever' in the first search string, and excluded the components of the third search string which were closely related to the concept of 'suspected sepsis'. This search retrieved 2,470 articles on MEDLINE, 280 of which had not been retrieved by our original search. The Venn diagram below illustrates the overlap in studies retrieved by the two search strategies.

Two authors (AC and RT) independently screened the 280 additional articles against the eligibility criteria used for the systematic review: 279 were excluded by screening of title and abstract; one article proceeded to full text review but was subsequently excluded as 85% (306/360) of the cohort were neonates and data disaggregated by age were not presented. Hence, this alternate search strategy did not identify any additional eligible articles.



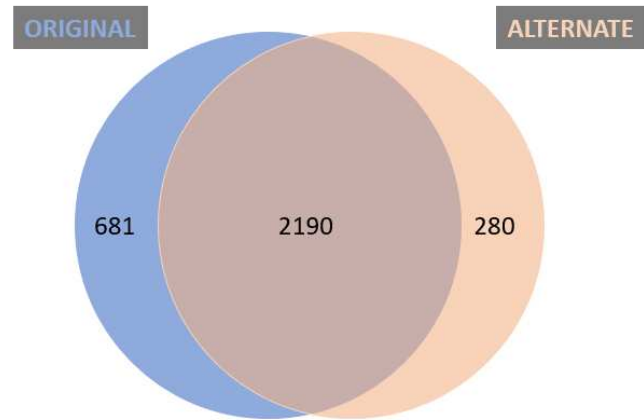

**Figure 1. Venn diagram to illustrate the overlap in retrieved studies between the original and alternate search strategies.**

## References

1. Cochrane Prognosis Methods Group. Cochrane Methods Prognosis Tools. 2020. <https://methods.cochrane.org/prognosis/tools> (accessed 30 April 2020 2020).
2. Geersing GJ, Bouwmeester W, Zuithoff P, Spijker R, Leeflang M, Moons KG. Search filters for finding prognostic and diagnostic prediction studies in Medline to enhance systematic reviews. *PLoS One* 2012; **7**(2): e32844.
3. Haynes RB, McKibbin KA, Wilczynski NL, Walter SD, Werre SR. Optimal search strategies for retrieving scientifically strong studies of treatment from Medline: analytical survey. *Bmj* 2005; **330**(7501): 1179.
4. Ingui BJ, Rogers MA. Searching for clinical prediction rules in MEDLINE. *Journal of the American Medical Informatics Association : JAMIA* 2001; **8**(4): 391-7.
5. Scott HF, Donoghue AJ, Gaieski DF, Marchese RF, Mistry RD. Effectiveness of physical exam signs for early detection of critical illness in pediatric systemic inflammatory response syndrome. *BMC Emergency Medicine* 2014; **14**(1): 24.
6. Goldstein B, Giroir B, Randolph A. International pediatric sepsis consensus conference: definitions for sepsis and organ dysfunction in pediatrics. *Pediatric critical care medicine : a journal of the Society of Critical Care Medicine and the World Federation of Pediatric Intensive and Critical Care Societies* 2005; **6**(1): 2-8.
